# Supplementary material for: Hybrid A–B–A type nanowires through cation exchange
Source: Royal Society of Chemistry journal article supplement (doi:10.1039/c1nr11124h), 2011-01-01
Supplement: c1nr11124h.pdf [file c1nr11124h.pdf]

## Electronic Supplementary Information (ESI)

# Hybrid A-B-A Type Nanowires through Cation Exchange

A. K. Samal and T. Pradeep \*

*DST Unit of Nanoscience (DST UNS), Department of Chemistry, Indian Institute of Technology Madras,  
Chennai 600 036 (India)*

\*Email: pradeep@iitm.ac.in, Fax: 91-44-2257-0545/0509.

### Supporting information 1

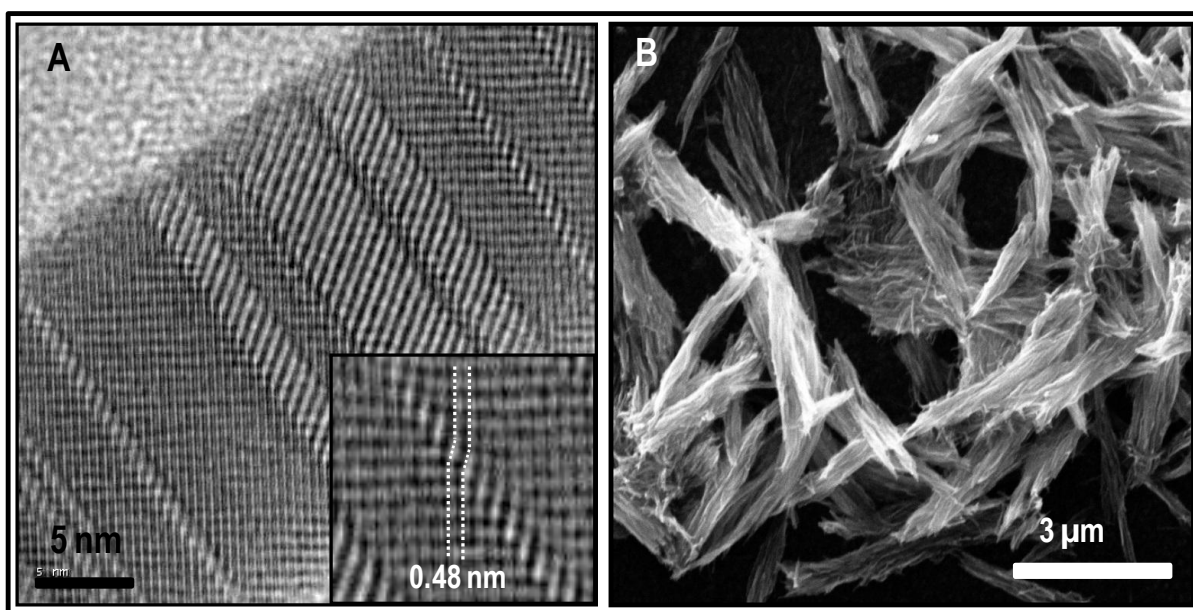

**Fig. S1** (A) HRTEM, and (B) large area SEM image of Hg<sup>2+</sup>-reacted Ag<sub>2</sub>Te NWs. Inset of A (stacking fault is marked) shows an expanded view of the stacking faults.

## Supporting information 2

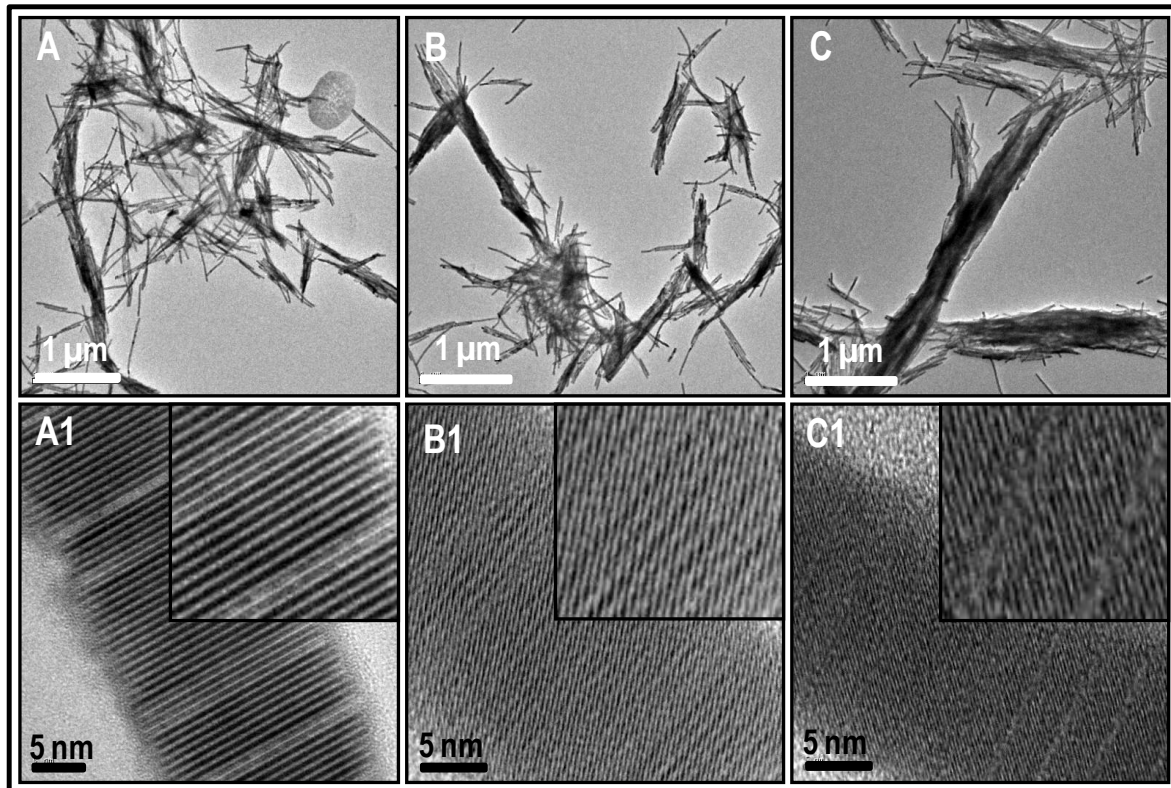

**Fig. S2** Large area TEM and HRTEM images of Ag<sub>2</sub>Te NWs reacted Pb<sup>2+</sup> (A) and (A1), Cd<sup>2+</sup> (B) and (B1), and Zn<sup>2+</sup> (C) and (C1). Insets show the expanded views of the respective images. No stacking faults are seen.

### Supporting information 3

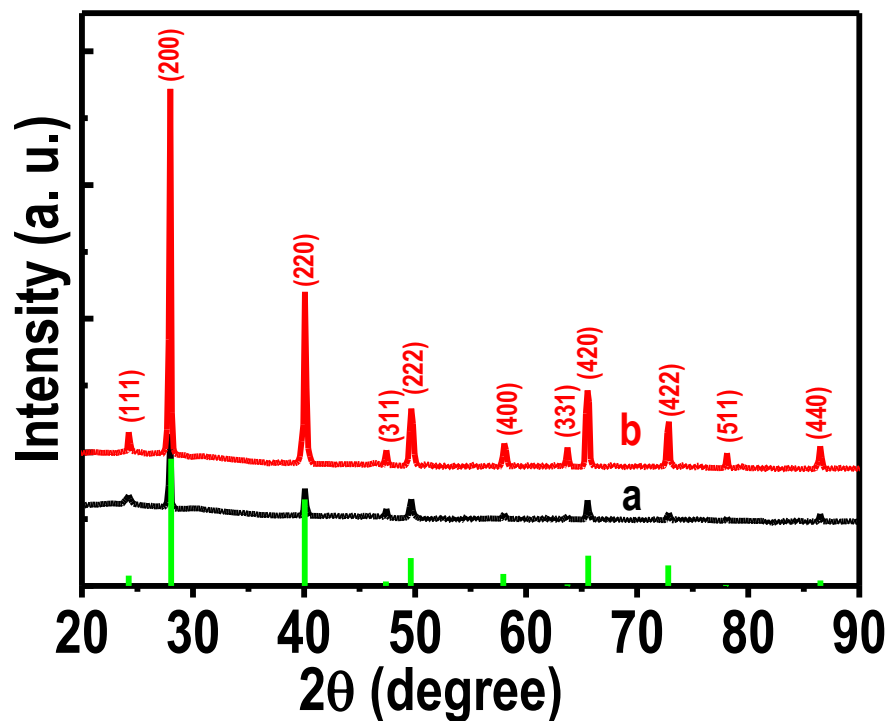

Fig. S3 XRD patterns of  $\text{Hg}^{2+}$ -reacted  $\text{Ag}_2\text{Te}$  NWs at different concentrations, (a) 100 and (b) 1000 ppm.

Standard peaks of  $\text{HgTe}$  (JCPDS: 75-2084) is given as stick spectrum.

### Supporting information 4

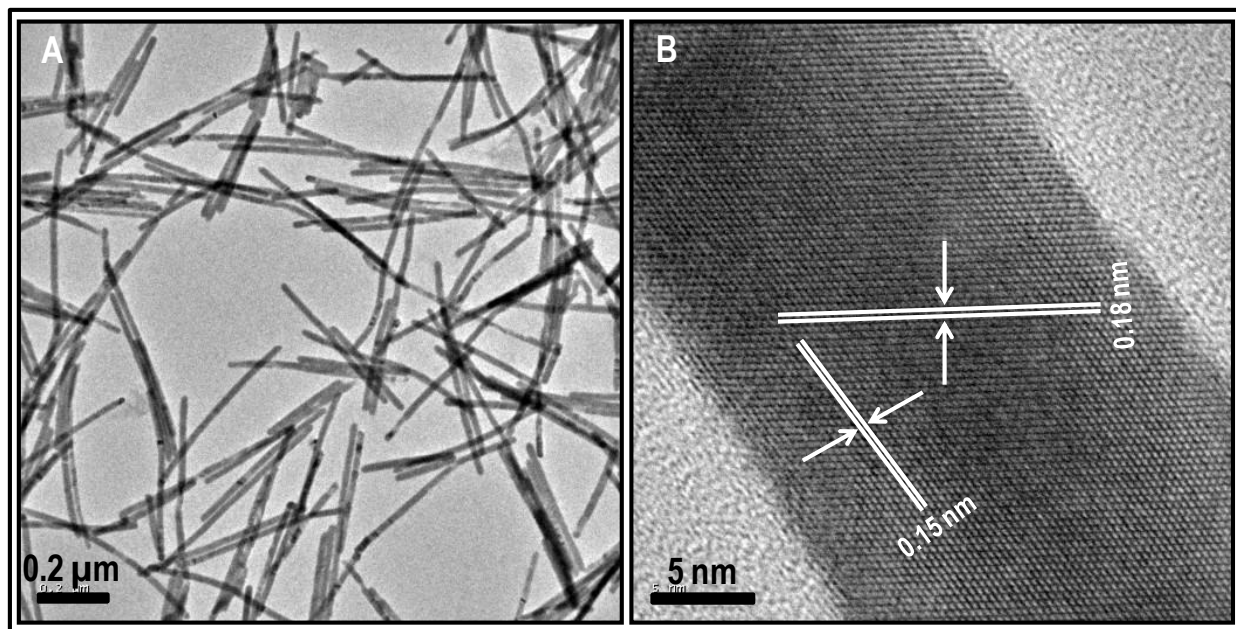

Fig. S4 (A) Large area TEM, and (B) HRTEM image of the body of a single NW of  $\text{Hg}^{2+}$  (1000 ppm) reacted  $\text{Ag}_2\text{Te}$  NWs.

### Supporting information 5

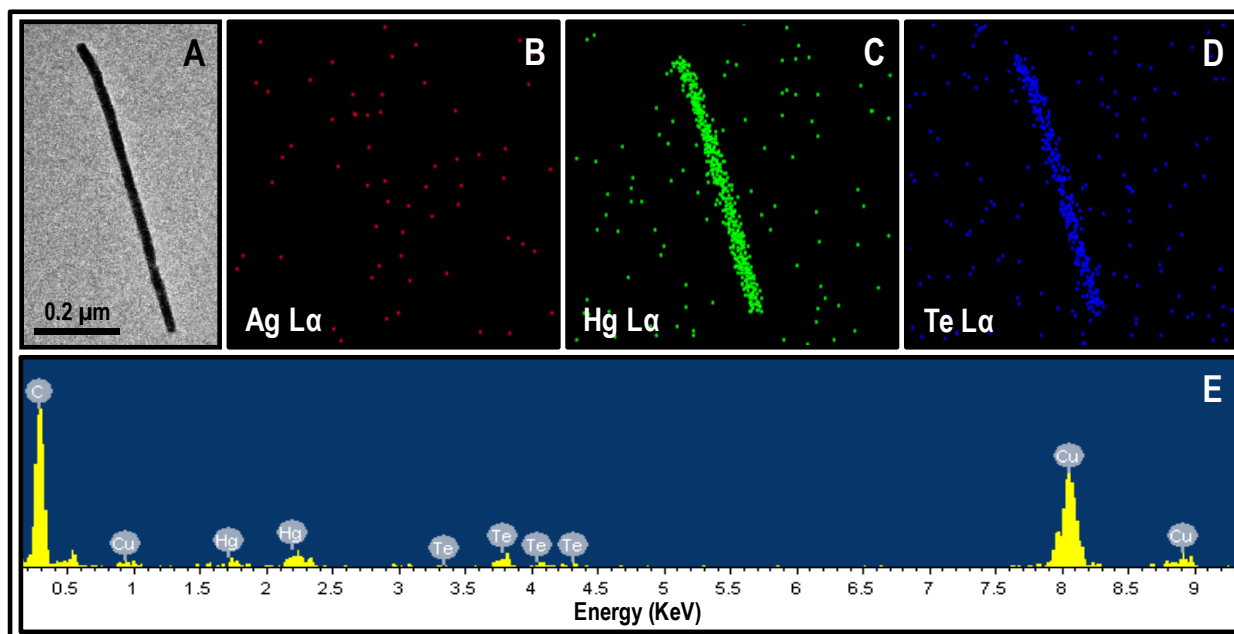

**Fig. S5** TEM image used for the elemental mapping (A), elemental mapping of Ag (B), Hg (C) and Te (D), and EDAX spectrum (E) of Hg<sup>2+</sup> (1000 ppm) reacted Ag<sub>2</sub>Te NWs. Cu is from the substrate used for the measurement.

### Supporting information 6

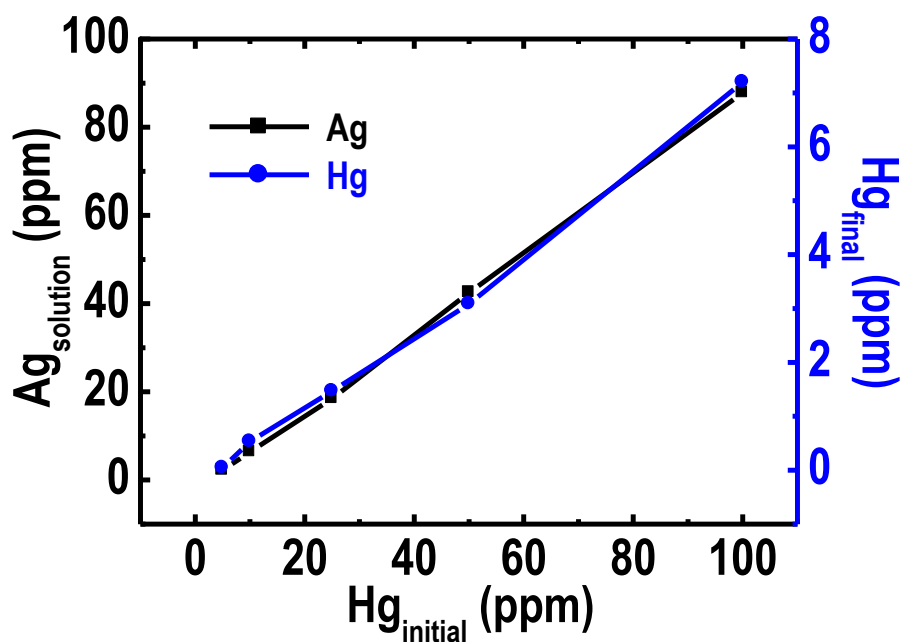

**Fig. S6** The plot shows the concentrations of Ag<sup>+</sup> and Hg<sup>2+</sup> in the supernatant against Hg<sup>2+</sup> used.

Supporting information 7

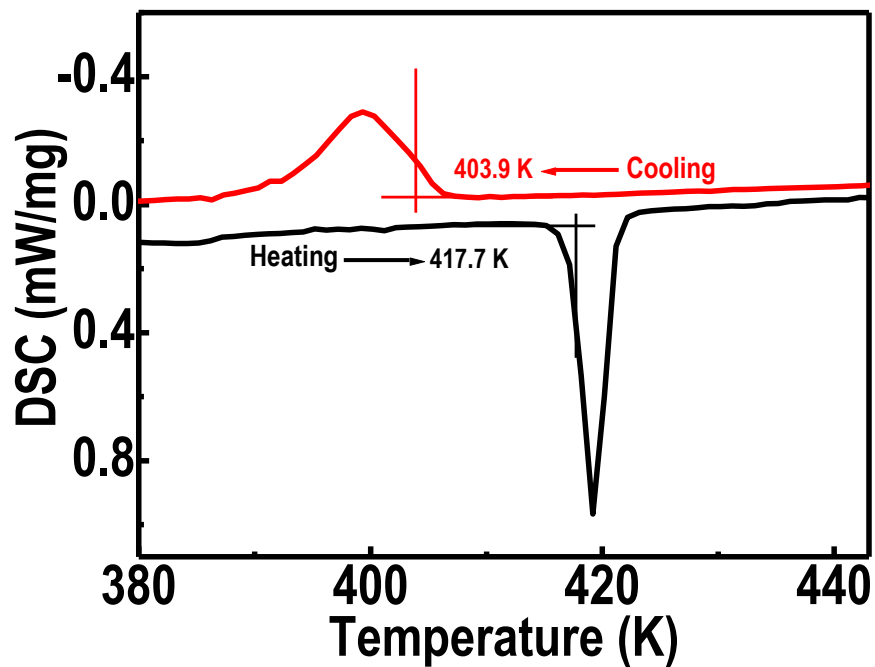

Fig. S7 DSC traces of Ag<sub>2</sub>Te NWs.

Supporting information 8

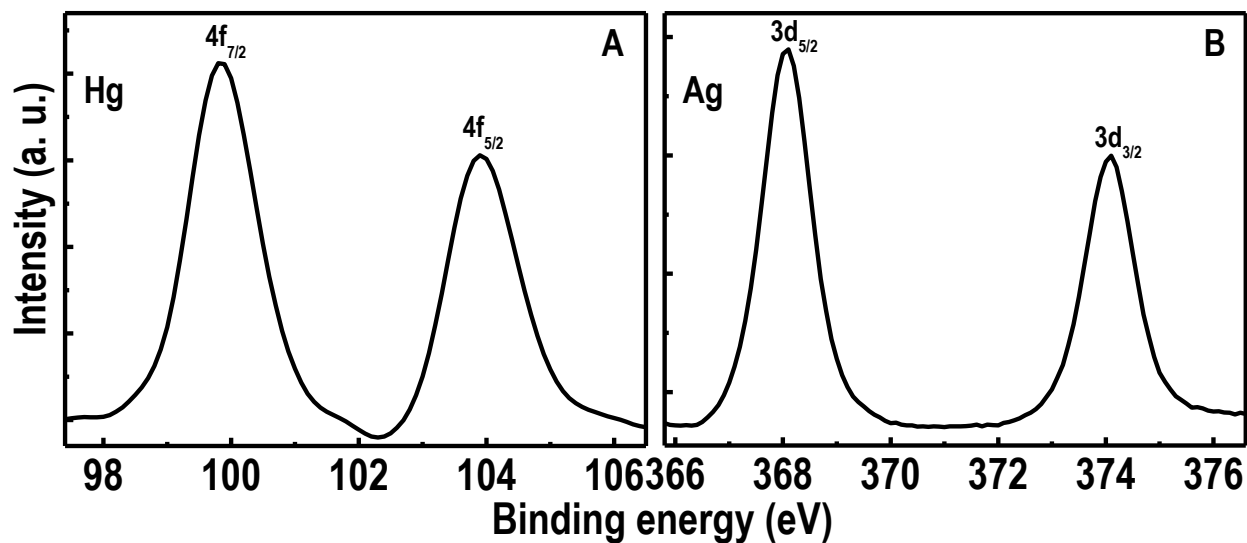

Fig. S8 Expanded XPS spectra in the Hg 4f (A) and Ag 3d (B) regions of Hg<sup>2+</sup>-reacted Ag<sub>2</sub>Te NWs.

### Supporting information 9

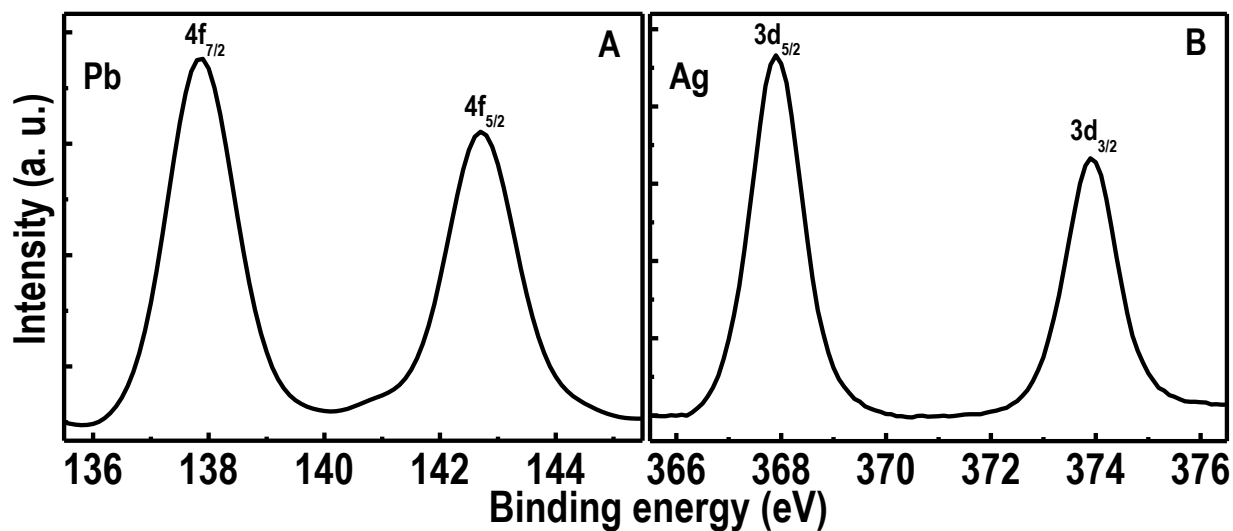

Fig. S9 Expanded XPS spectra in the Pb 4f (A) and Ag 3d (B) regions of  $Pb^{2+}$ -reacted  $Ag_2Te$  NWs.

### Supporting information 10

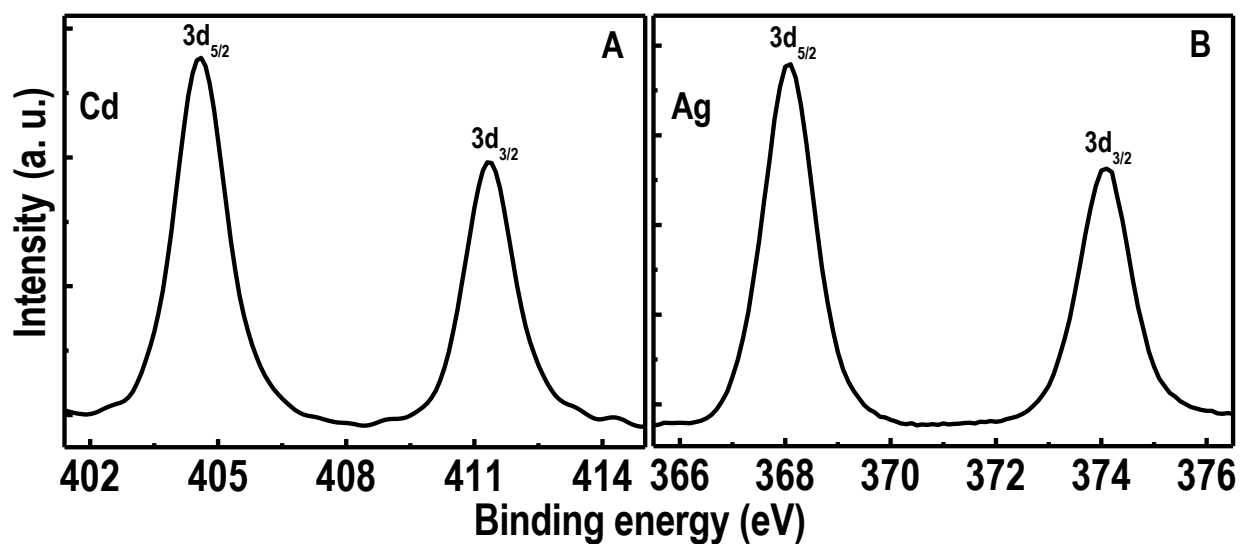

Fig. S10 Expanded XPS spectra in the Cd 3d (A) and Ag 3d (B) regions of  $Cd^{2+}$ -reacted  $Ag_2Te$  NWs.

### Supporting information 11

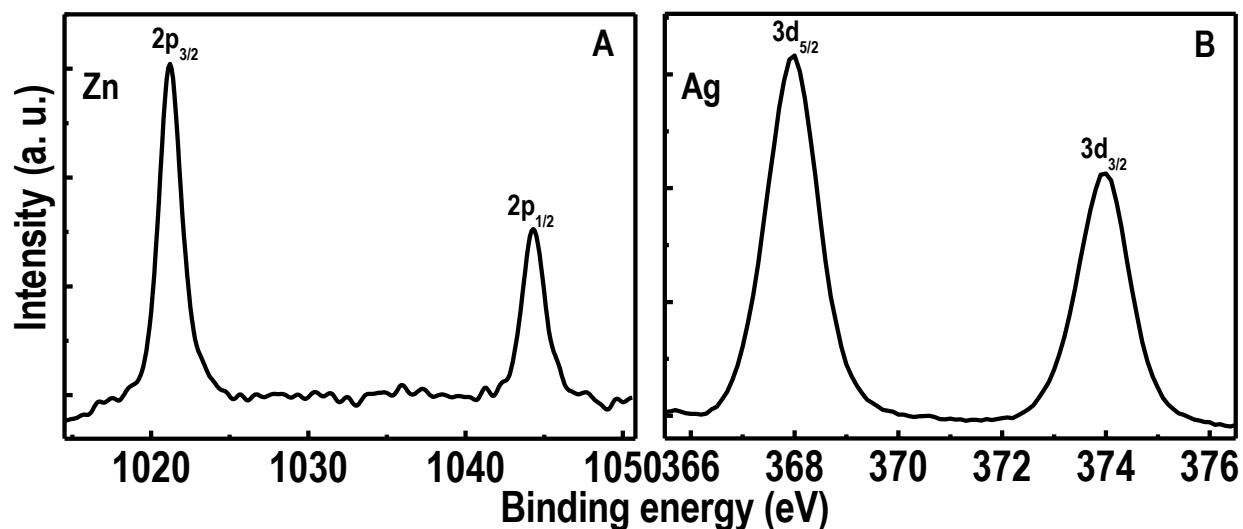

Fig. S11 Expanded XPS spectra in the Zn 2p (A) and Ag 3d (B) regions of  $Zn^{2+}$ -reacted  $Ag_2Te$  NWs.

### Supporting information 12

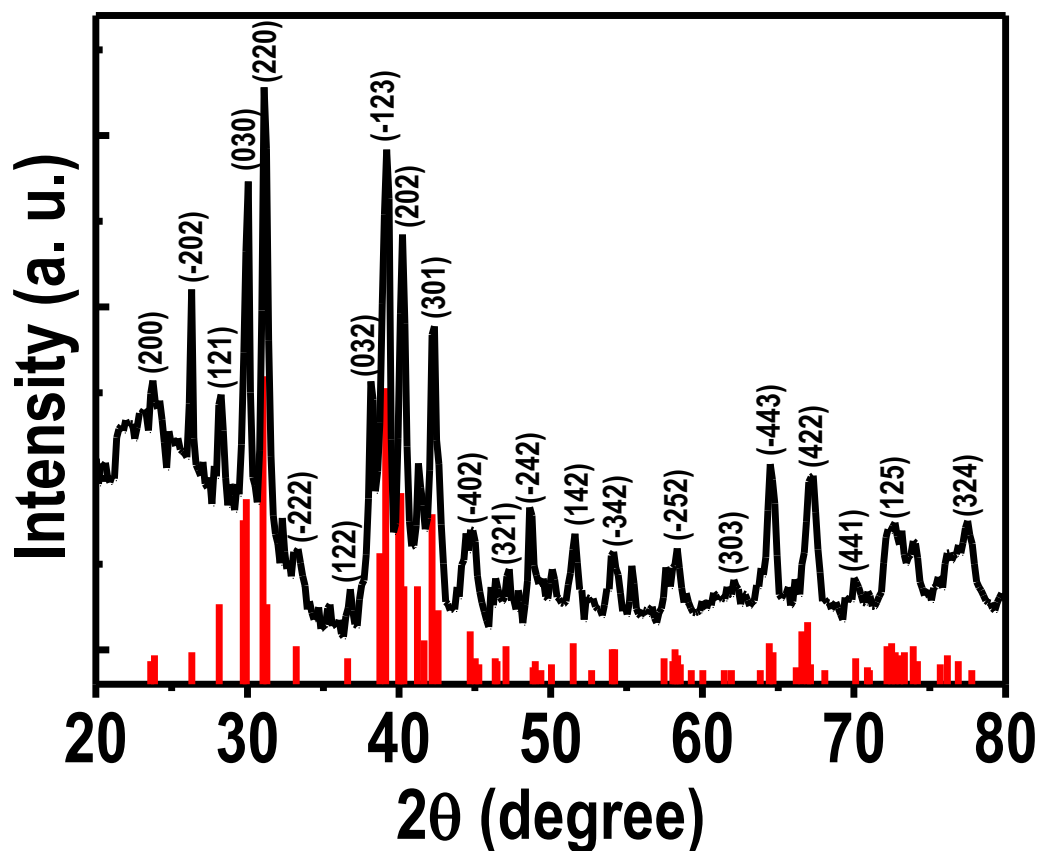

Fig. S12 XRD patterns of  $Hg^{2+}$  added to  $Zn^{2+}$ -reacted  $Ag_2Te$  NWs (black trace), indicating no change occurred after the addition of  $Hg^{2+}$ . Standard peaks of  $Ag_2Te$  (JCPDS: 34-0142) is given as stick spectrum.
